# Supplementary material for: Identification of Regions Involved in the Physical Interaction between Melanocortin Receptor Accessory Protein 2 and Prokineticin Receptor 2
Source: MDPI journal article supplement (doi:10.3390/biom12030474), 2022-03-20

Identification of regions involved in physical interaction between Melanocortin Receptor Accessory Protein 2 and Prokineticin Receptor 2

Maria Rosaria Fullone<sup>1</sup>, Daniela Maftai<sup>2</sup>, Martina Vincenzi<sup>2</sup>, Roberta Lattanzi<sup>2</sup>, Rossella Miele<sup>1\*</sup>

<sup>1</sup>Department of Biochemical Sciences “Alessandro Rossi Fanelli”, Sapienza University of Rome, Piazzale Aldo Moro 5, I-00185 Rome, Italy  
<sup>2</sup>Department of Physiology and Pharmacology “Vittorio Erspamer”, Sapienza University of Rome, Piazzale Aldo Moro 5, I-00185 Rome, Italy

Figure S1. Original western blots of figure 1

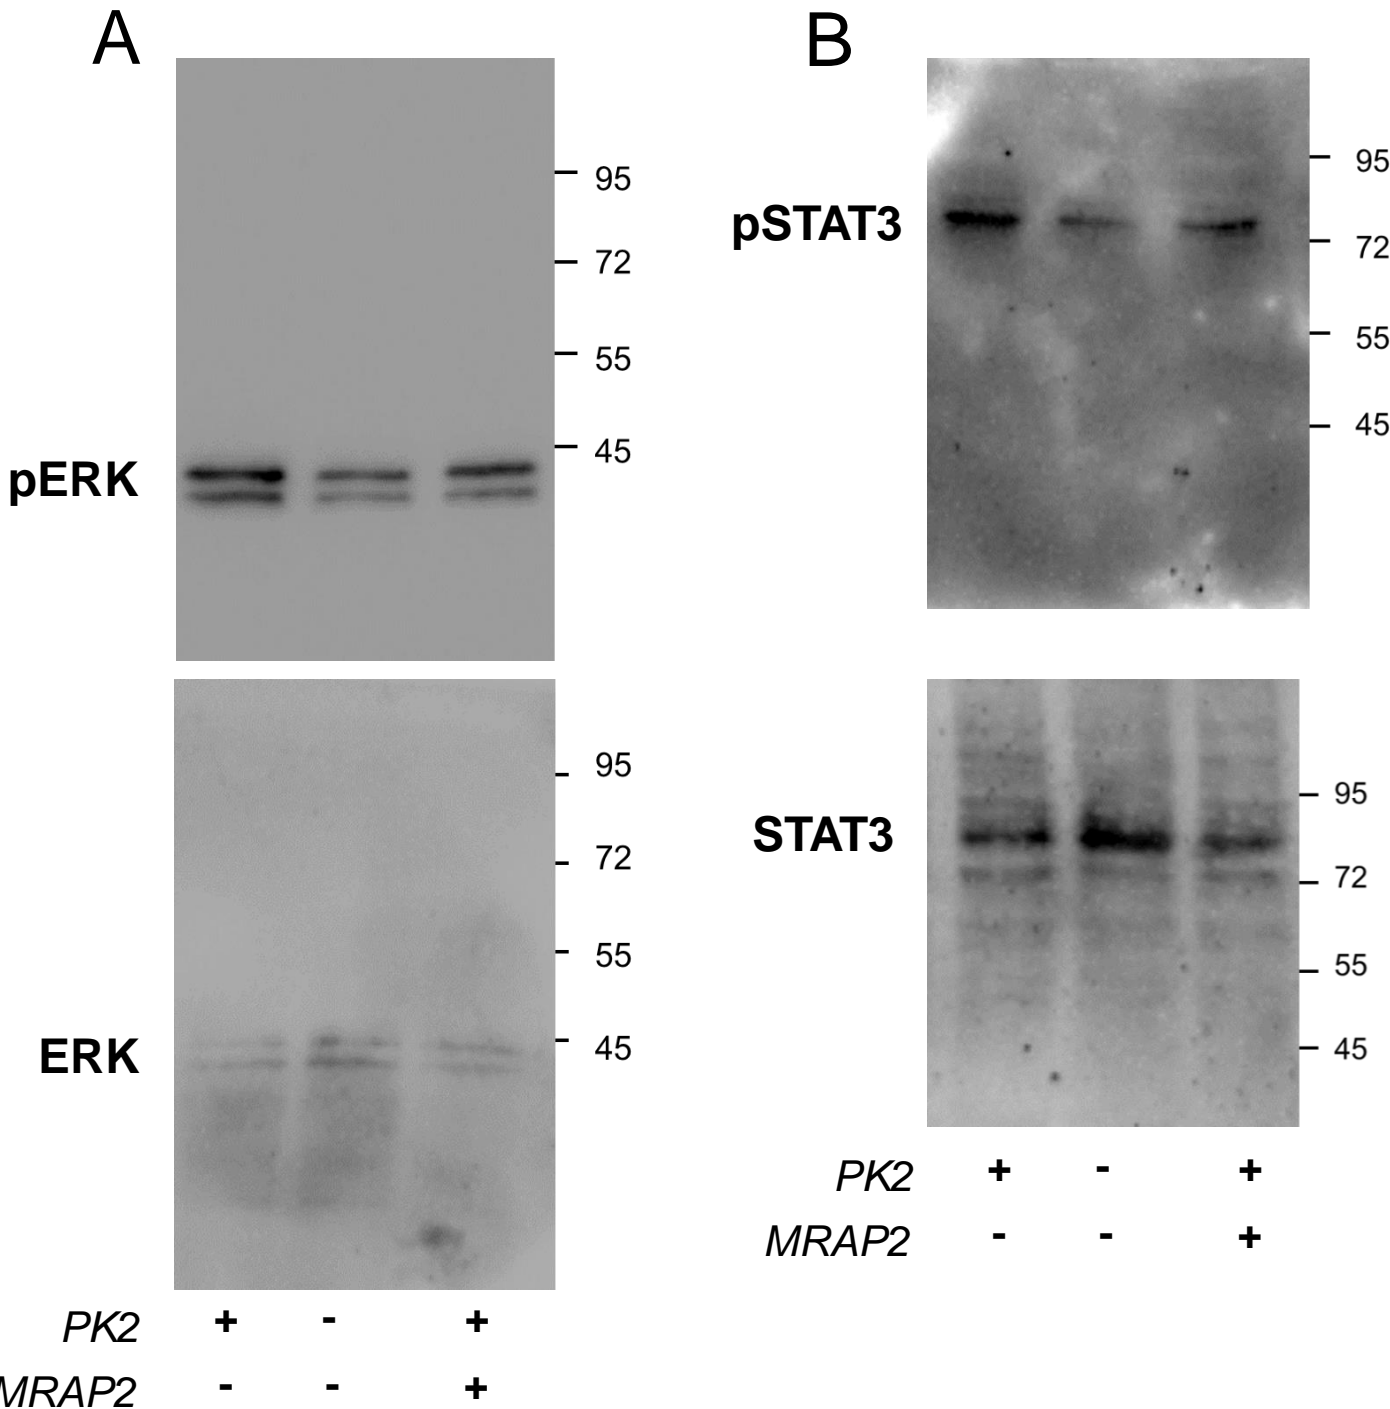

Figure S2. Original western blots of figure 5

**B** Adipose tissue

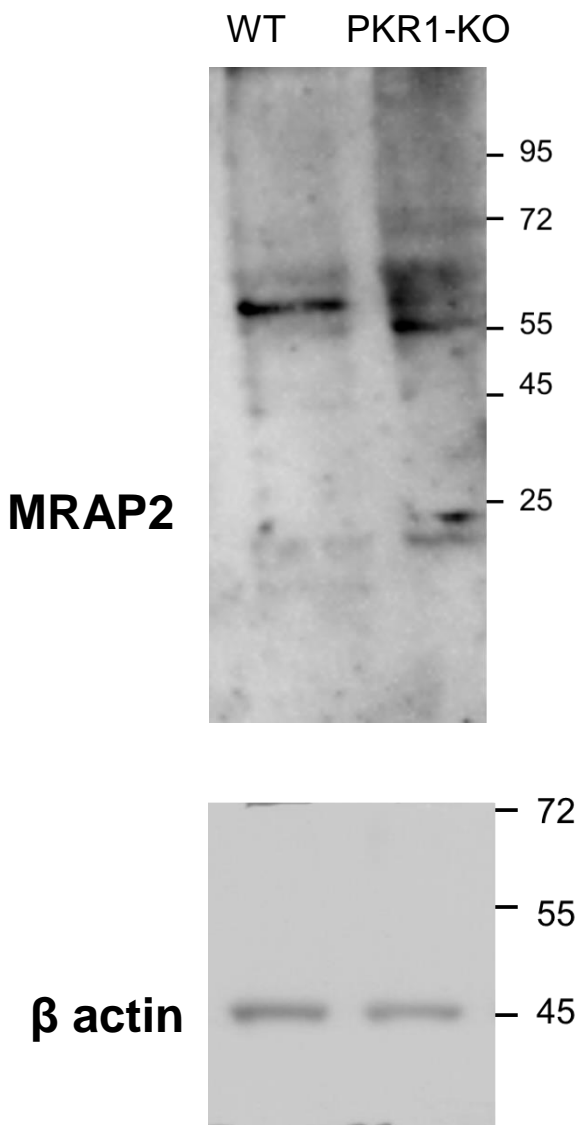

**D** Hypothalamic explants

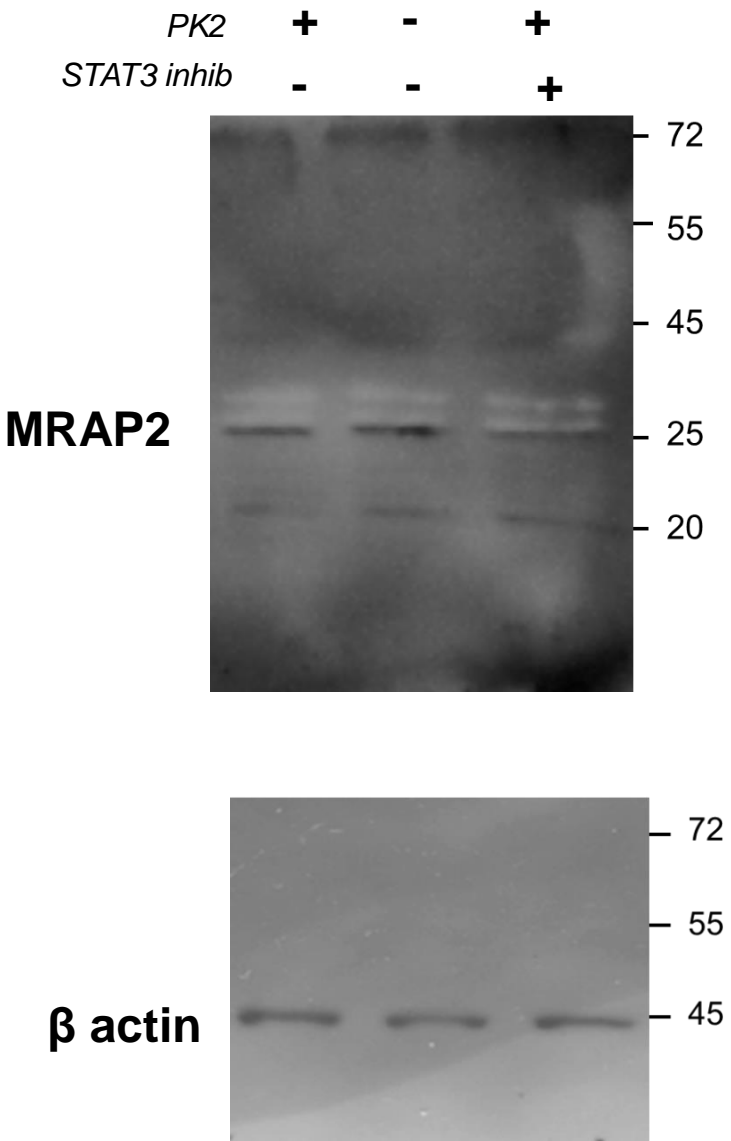

**Figure S3.** Expression of MRAP2 in different mouse tissues. 10 ug of total proteins were analyzed western blot analysis. S: skin; C: colon; A: adypocytes; B:brain

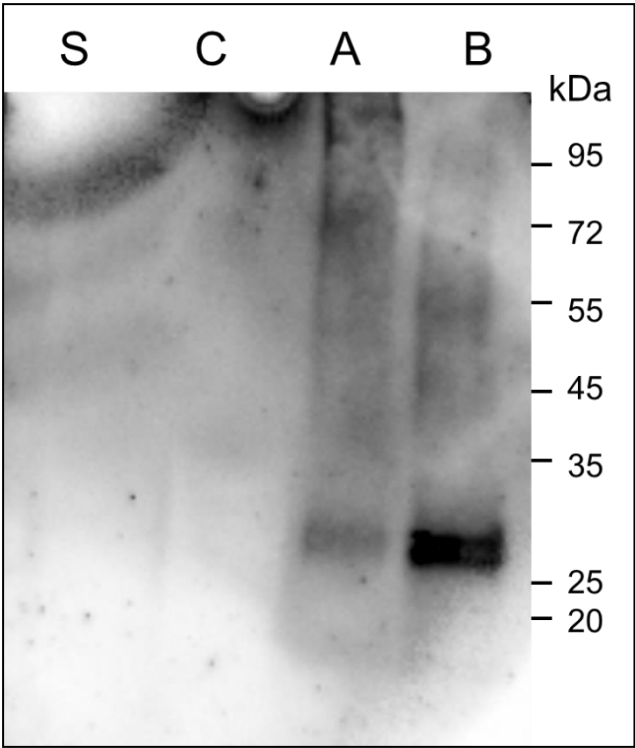

**Figure S4.** Cross-linking of MRAP2 with PKR2 or  $\Delta$ N-PKR2 receptors. Membrane proteins prepared from *S. cerevisiae* cells expressing the PKR2-MRAP2 and  $\Delta$ N-PKR2 -MRAP2 were incubated in the presence (+) or absence (-) of BS<sup>3</sup>. Proteins were immunoblotted and probed with anti-PKR2 antibody. The arrow indicates the complex PKR2/MRAP2

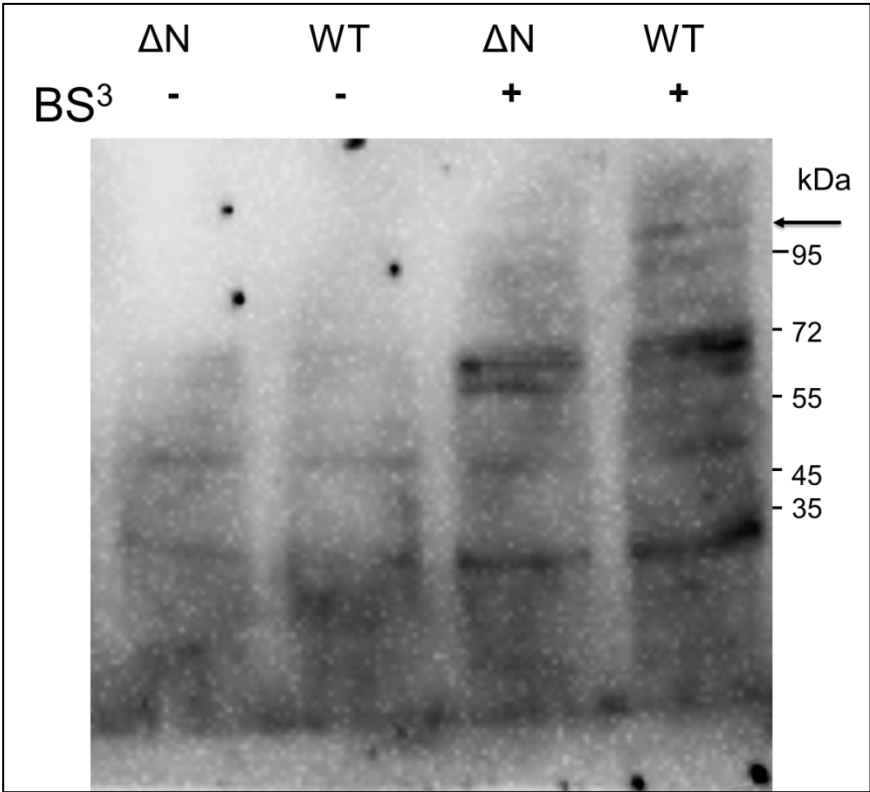

Supplement: s1 [file s1]
